# Transgenerational dynamics of rDNA copy number in *Drosophila* male germline stem cells

Kevin L. Lu<sup>1,2,3</sup>, Jonathan O. Nelson<sup>1,6</sup>, Natalie Warsinger-Pepe<sup>1,4</sup>, Yukiko M. Yamashita<sup>1,2,5,6,\*</sup>

<sup>1</sup>Life Sciences Institute, <sup>2</sup>Cellular and Molecular Biology Program, <sup>3</sup>Medical Scientist Training Program, <sup>4</sup>Department of Molecular and Integrative Physiology, <sup>5</sup>Department of Cell and Developmental Biology, <sup>6</sup>Howard Hughes Medical Institute, University of Michigan Ann Arbor, MI 48109, USA

\* correspondence: yukikomy@umich.edu

## Abstract

rDNA loci, composed of hundreds of tandemly duplicated arrays of rRNA genes, are known to be among the most unstable genetic elements due to their repetitive nature. rDNA instability underlies aging (replicative senescence) in yeast cells, however, its contribution to the aging of multicellular organisms is poorly understood. In this study, we investigate the dynamics of rDNA loci during aging in the *Drosophila* male germline stem cell (GSC) lineage, and show that rDNA copy number decreases during aging. Our study further reveals that this age-dependent decrease in rDNA copy number is heritable from generation to generation, yet GSCs in animals that inherit reduced rDNA copy number are capable of recovering normal rDNA copy number. Based on these findings, we propose that rDNA loci are dynamic genetic elements, where rDNA copy number changes dynamically yet is maintained through a recovery mechanism in the germline.

## Introduction

The ribosomal DNA (rDNA) loci consist of tandem repetitive arrays of the rRNA genes, which code for the mature RNA components of ribosomes, flanked by intergenic spacer sequences (IGS) (Figure 1A). rDNA loci are considered to be one of the most unstable regions of the genome due to their repetitive nature and high transcriptional activity. First, as an inherent characteristic of repetitive DNA, rDNA can undergo intra-chromatid recombination leading to copy number loss and generation of circularized repeat units (extrachromosomal rDNA circles (ERCs)) (Figure 1A) (Sinclair and Guarente, 1997). Second, the rDNA is highly transcribed even during S phase, leading to possible collisions between replication and transcription machineries. This collision can result in double strand breaks, further contributing to genomic instability of the rDNA (Helmrich et al., 2013; Takeuchi et al., 2003).

In yeast, rDNA instability (i.e. reduction of rDNA copy number and associated accumulation of ERCs) is a major cause of replicative aging/senescence (Ganley and Kobayashi, 2014; Kobayashi, 2011; Sinclair and Guarente, 1997). The state of rDNA stability in various mutants that either stabilize or decrease rDNA copy number correlates well with lengthened or shortened life span, respectively (Ganley and Kobayashi, 2014). Despite clear involvement of the rDNA in the replicative lifespan of yeast, whether and how rDNA instability contributes to aging of multicellular organisms remains unclear. In particular, stem cells proliferate throughout the life of multicellular organisms, and their declining number and/or function during aging is proposed to be an underlying cause of organismal aging, due to inability to replenish essential cell populations (Lopez-Otin et al., 2013). Despite the clear relationship between rDNA and aging, and that between aging and stem cells, little is known about whether or how the rDNA may change in stem cells during organismal aging.

In this study, we investigate the dynamics of the rDNA loci during aging in *Drosophila* male germline stem cells (GSCs). *Drosophila* male GSCs serve as an excellent experimental paradigm to study rDNA stability during aging, by providing a genetically tractable system to examine the aging of stem cells at a single cell resolution. GSCs undergo continuous asymmetric

divisions throughout adulthood, producing one self-renewed GSC and one differentiating cell (Inaba and Yamashita, 2012). Additionally, *Drosophila* rDNA loci are limited to the sex chromosomes (X and Y), providing a simplified system to assess rDNA stability compared to other animal models that have multiple rDNA loci spread across many chromosomes (McStay, 2016). We show that male GSCs undergo destabilization of rDNA during aging. This rDNA destabilization manifests cytologically as abnormal morphology of the nucleolus, which is the site of rDNA transcription (Boisvert et al., 2007; Pederson, 2011). We find that rDNA transcription is normally restricted to the Y chromosome in GSCs, as has been observed in other male *Drosophila* cell types (Greil and Ahmad, 2012; Zhou et al., 2012), but GSCs with abnormal nucleolar morphology have transcriptional activation of normally-silent X rDNA locus. Our results indicate that X rDNA activation is likely to compensate for reduction in rDNA copy number that progresses during aging. We further show that such destabilization of rDNA is heritable, impacting the rDNA copy number of the germline and GSC nucleolar morphology in the next generation. Strikingly, we found that GSCs in the F<sub>1</sub> generation are capable of recovering rDNA copy number in the early ages of adulthood, revealing the likely presence of a mechanism that maintains rDNA copy number through generations. We further show that this recovery requires the same factors needed for the phenomenon known as ‘rDNA magnification’ (Hawley and Tartof, 1983; Hawley and Tartof, 1985; Ritossa, 1968), which recovers rDNA copy number in the germline of males with large deletions of rDNA. Taken together, we propose that the rDNA represents dynamic genetic loci that undergo degeneration and recovery during the aging of individuals and through generations.



## Results

### **Nucleolar morphology is perturbed during the aging of *Drosophila* male germline stem cells.**

To investigate the potential destabilization of rDNA in *Drosophila* male GSCs, we first examined nucleolar morphology during aging. The nucleolus is organized by transcription of the rDNA, thus its morphology is expected to reflect the transcriptional activity of rDNA loci (Boisvert et al., 2007; Pederson, 2011). Immunofluorescence staining of the nucleolar component Fibrillarin (Ochs et al., 1985) showed that most GSCs in young males contain a single, round nucleolus approximately 2  $\mu$ m in diameter (89.2%, n=408, Figure 1B, 'normal'). However, we found that the frequency of GSCs with normal nucleolar morphology progressively decreased during aging throughout 40 days of adulthood (Figure 1C), as the GSCs with abnormal nucleolar morphology increased. Abnormal nucleolar morphology can be categorized into two types: 1) fragmented, where more than one distinct nucleolar foci were observed, and 2) deformed, where the nucleolus lost its typical compact, round morphology (Figure 1B, 'fragmented' and 'deformed'). Although fragmented and deformed nucleoli are sometimes difficult to distinguish from each other and may indeed represent the same population of cells, we scored them separately to protect against losing information. However, these two populations behaved similarly in most assays performed in this study. These results show that nucleolar morphology is progressively perturbed during the aging of *Drosophila* male GSCs, prompting us to further investigate the underlying causes.

### **Perturbed nucleolar morphology is associated with transcriptional activation of the normally silent X chromosome rDNA locus.**

To investigate the underlying cause(s) of perturbed nucleolar morphology, we first examined the spatial relationship between the nucleolus and the rDNA loci that organize nucleolus formation. In *Drosophila melanogaster*, the rDNA loci are located on the sex chromosomes (X and Y), each containing ~200-250 copies of rDNA (Figure 2A) (Ritossa et al., 1971). The X and Y rDNA loci can be detected by DNA fluorescence *in situ* hybridization (FISH) using chromosome-specific probes against the (AATAAAC)<sub>n</sub> satellite and the 359-bp repeat satellite, which are adjacent to the Y and X rDNA loci, respectively (Figure 2A). By combining

DNA FISH with immunofluorescence staining to detect nucleoli, we found that the Y rDNA locus is always associated with the nucleolus when GSCs have normal nucleolar morphology, whereas the X rDNA locus was not, irrespective of age (Figure 2B). Because the assembly of the nucleolus reflects rDNA transcription, these results suggest that Y rDNA is actively transcribed, whereas X rDNA is not. This likely reflects a phenomenon known as ‘nucleolar dominance’, where only certain rDNA loci (Y rDNA in the case of *D. melanogaster* males) are actively transcribed while the others (X rDNA in *D. melanogaster* males) are silent (see below) (Greil and Ahmad, 2012; Zhou et al., 2012).

Interestingly, when the nucleolus is fragmented, the ectopic nucleolus (typically the smaller one) was almost always associated with the X rDNA locus, irrespective of age (Figure 2C, n=46/46, 100.0% in 0-1 day old flies, n=46/47, 97.9% in 40 day old flies). X rDNA was also associated with deformed nucleoli (Figure 2D). These results suggest that the X chromosome has gained nucleolar organizing activity (i.e. became transcriptionally active) in GSCs when the nucleolar morphology is abnormal.

To directly test the idea that abnormal nucleolar morphology is associated with transcriptional activation of the normally inactive X rDNA locus, we adapted single nucleotide polymorphism (SNP) RNA *in situ* hybridization to differentially visualize the X and Y rDNA transcripts (Levesque et al., 2013) (Figure 2 – figure supplement 1A). By genetically isolating and sequencing rDNA arrays from the X and Y chromosomes, we identified four SNPs in the coding and ITS sequences between the X and Y rDNA loci of the wild type strain used in this study (yw) (see methods). We designed probes (‘SNP probes’) utilizing these four SNPs to distinguish X- vs. Y-derived rRNA transcripts (Supplementary Table 1). Specificity of SNP probes was confirmed by SNP *in situ* hybridization in X/O males (containing only X rDNA), and C(1)DX/Y females (containing only Y chromosome rDNA), where only the expected SNP signals were observed (Figure 2 – figure supplement 1B).

We combined SNP *in situ* hybridization with the nucleolar marker Nopp140-GFP (McCain et al., 2006) to correlate X- vs. Y-derived rRNA transcription with nucleolar morphology. We found that most GSCs only transcribed Y rRNA (Figure 2E, F, H), demonstrating that nucleolar dominance indeed occurs in the male germline, as observed in male larval neuroblasts (Greil and Ahmad, 2012; Zhou et al., 2012). In all GSCs with fragmented nucleoli, one nucleolus (typically the larger one) showed a Y SNP signal, whereas the other showed an X SNP signal, supporting the idea that nucleolar fragmentation is associated with transcriptional activation of the X rDNA locus (Figure 2E, G, n>40). As flies age, many GSCs exhibited expression of rRNA from both the Y and X chromosomes (Figure 2G, H). The number of GSCs expressing X rRNA increased from 18.2±3.0% at 0 days old to 37.2±2.4% at 40 days old (Figure 2H). These results, together with the above result that showed association of the X rDNA locus with fragmented/deformed nucleoli (Figure 2A-F), strongly suggest that abnormal nucleolar morphology that accumulates in GSCs during aging is due to activation of the normally silent X rDNA locus, causing rDNA transcription from two separate chromosomes that each form distinct nucleoli.

#### **Y chromosome rDNA copy number decreases in the male germline during aging.**

Why does the X rDNA locus activate in aging GSCs? We hypothesized that rDNA copy number might be reduced during aging due to the inherent instability of the repetitive locus, requiring compensatory activation of a normally silent rDNA locus (i.e. X rDNA) to meet the cellular requirement for rRNA transcription. It has been extensively shown in yeast that stability of the rDNA is compromised during aging, with intra-strand recombination leading to loss of rDNA on the chromosomes (Ganley et al., 2009; Ganley and Kobayashi, 2014; Kobayashi, 2008), leading us to hypothesize that a similar process may underlie the aging of *Drosophila* male GSCs.

To address the possibility that rDNA copy number might be decreased during aging in male GSCs, we first isolated genomic DNA from testes of young and old flies and quantified their rDNA copy number using a previously published qPCR-based method for quantifying rDNA copy number (Supplementary Table 2) (Aldrich and Maggert, 2014), and found a significant reduction in rDNA copy number (Figure 3A). This copy number loss was observed across all the mature rRNA

genes in the 45S cistron (18S, 5.8S and 28S rRNA genes). Interestingly, the copy number of R1 and R2 retrotransposable elements did not decrease with age (Figure 3A). R1 and R2 retrotransposable elements selectively insert into the 28S rRNA gene, and inserted rDNA units are transcriptionally repressed (Ye and Eickbush, 2006). These results suggest that the rDNA copy number loss primarily occurs in uninserted, actively-transcribed rDNA (Figure 3A). These results imply that loss of rDNA copy number is associated with its transcriptional activity, consistent with the well-established notion that collision between transcription and replication machineries causes rDNA instability (Helmrich et al., 2013; Takeuchi et al., 2003).

Given that Y rDNA is exclusively transcribed in most young GSCs (Figure 2H), and that rDNA copies with retrotransposon insertion, which are known to be mostly silenced (Ye and Eickbush, 2006), are not lost during aging (Figure 3A), we hypothesized that the transcriptionally active Y rDNA copies are more frequently lost than normally silent X rDNA copies during aging. To assess this possibility, we used a quantitative DNA fluorescence *in situ* hybridization (FISH) method to examine changes in relative copy number of rDNA on X and Y chromosomes during aging. Using DNA FISH on chromosome spreads from mitotic spermatogonia and meiotic spermatocytes (at stages when the X and Y chromosomes are not paired), we examined the relative fluorescence intensity of rDNA probes between X and Y chromosome rDNA loci in individual germ cells (Figure 3B-F). Quantification of fluorescence signal (see methods, Supplementary Table 3) successfully detected reduced rDNA copy number of the *Df(YS)bb* chromosome, a variant Y chromosome with a partial rDNA deletion; when combined with the X chromosome of the standard wild type strain used in this study (*yw*), we found that Y:X ratio of the 18S rRNA gene in wild type (*yw*) was  $1.35 \pm 0.31$  at day 0, whereas *Df(YS)bb*:X rDNA ratio was  $0.46 \pm 0.08$  (Figure 3E). When using a probe for the 240-bp repeat intergenic spacer (240-IGS), the Y:X ratio was  $2.88 \pm 0.60$  in wild type at day 0, whereas the *Df(YS)bb*:X ratio was  $0.42 \pm 0.08$  (Figure 3F). These results established that our DNA FISH method is sensitive enough to distinguish relative copy number differences between X and Y chromosome rDNA loci.

By using this method, we compared Y:X rDNA ratio in day 0 vs. day 40 old testes. We found that the Y:X 18S rRNA gene ratio dropped from  $1.35 \pm 0.31$  to  $0.70 \pm 0.25$  by 40 days (Figure 3E) and that the Y:X 240-IGS ratio reduced from  $2.88 \pm 0.60$  at 0 days to  $1.86 \pm 0.58$  by 40 days (Figure 3F). Although the quantitative FISH method is only capable of detecting the ratio between X and Y, but not the absolute amount on each chromosome, the fact that overall germline rDNA copy number decreases during aging as demonstrated by qPCR (Figure 3A) suggests the change in Y:X ratio reflects Y rDNA loss, and not X rDNA expansion. It is possible that X rDNA copy number also decreases during aging, but the results indicate that the Y chromosome rDNA is predominantly (or preferentially) destabilized during aging, possibly leading to compensatory activation of X rDNA and abnormal nucleolar morphology.

Since all adult germ cells are derived from GSCs, the loss in Y rDNA copies in the germline (detected by qPCR and quantitative FISH) suggests that Y rDNA copy number is reduced in GSCs. To directly address the causal relationship if reduced rDNA copy number on the Y chromosome causes disrupted nucleolar morphology in GSCs, we examined GSC nucleolar morphology in *X/Df(YS)bb* flies, which harbors partial deletion of Y rDNA. Even at a young age, GSCs in these flies exhibited abnormal nucleolar morphology at a frequency comparable to 40 day old wild type flies (Figure 3G, H). Taken together, we propose that rDNA copy number decreases during aging in male GSCs, which specifically (or more profoundly) occurs to the Y chromosome rDNA locus likely due to its transcriptionally active state. The reduction in rDNA copy number on the Y chromosome then leads to compensatory activation of X rDNA in GSCs, causing abnormal nucleolar morphology.

### **GSC nucleolar morphology and rDNA loss is heritable**

Because GSCs are the progenitors of gametes, we reasoned that rDNA copy number loss during the aging of germline may be heritable to the next generation. To test this idea, we examined the  $F_1$  sons from old (day 40) parents ( $P_0$ ) (Figure 4A). qPCR on genomic DNA collected from testes of newly-eclosed  $F_1$  flies showed a significant reduction in the rDNA copy number when compared to young  $P_0$  flies (0d  $P_0$ ), but similar to 40 day old  $P_0$  (40d  $P_0$ ) (Figure 4B). Again,

the number of R1- and R2-inserted rDNA copies was not significantly affected. These results suggest that old parents transmit reduced rDNA copy number to their offspring.

Consistent with the reduced copy number of rDNA in  $F_1$  sons measured by qPCR, nucleolar morphology in  $F_1$  GSCs from old parents was also perturbed, with only 59.1% of GSCs displaying normal nucleolar morphology in 0 day old  $F_1$  sons (0d  $F_1$ ), similar to 40 day old  $P_0$  fathers (40d  $P_0$ ) (Figure 4C). Furthermore, SNP *in situ* hybridization demonstrated similar levels of activation of the X rDNA locus in 40 day old  $P_0$  and 0 day old  $F_1$  GSCs from the sons of old fathers, consistent with disrupted Y rDNA copy number in these flies (Figure 4D).

Examining GSC nucleolar morphology in progeny from multiple genetic crosses provided insight into the dynamics of rDNA copy number on X and Y chromosomes in aged fathers. When 40 day old fathers (contributing  $Y^{old}$  to their sons) were crossed to young mothers (contributing  $X^{young}$  to their sons), the newly-eclosed  $F_1$  sons ( $X^{young}/Y^{old}$ ) displayed disrupted GSC nucleolar morphology, suggesting that Y chromosomes from aged fathers are compromised (Figure 4E, column 3 compared to column 1). In contrast, when young fathers (contributing  $Y^{young}$ ) were crossed to 40 day old virgin mothers (contributing  $X^{old}$ ), their offspring containing  $X^{old}$  and  $Y^{young}$  chromosomes did not show perturbed nucleolar morphology (Figure 4E, column 1 vs. column 4), suggesting that male GSC nucleolar morphology is determined solely by the age of the inherited Y chromosome. This may be in part due to the dominance of the Y chromosome rDNA locus over the X rDNA locus, and does not necessarily reveal the state of the maternally inherited X chromosome, or whether the X chromosome undergoes degeneration during aging in females. However, the state of the X chromosome ( $X^{young}$  vs.  $X^{old}$ ) passed from the mother appears to affect the degree of disruption of nucleolar morphology in the context of the Y chromosome from the old father ( $Y^{old}$ ) (Figure 4E, column 2 and column 3). This might suggest that the X chromosome rDNA might also undergo degeneration in the female germline during aging (see discussion).

Taken together, we conclude that rDNA copy number reduction is heritable and passed to the offspring from old fathers.

## **Germline rDNA recovers in the F<sub>1</sub> generation**

Although F<sub>1</sub> sons from old fathers started with disrupted GSC nucleolar morphology, we unexpectedly found that nucleolar morphology recovered as these F<sub>1</sub> sons age (Figure 5A). Interestingly, the recovery was specifically observed during the first 10 days after eclosion. At 10 days, F<sub>1</sub> sons from old fathers recovered to the point where they were comparable to F<sub>1</sub> sons of the same age from young fathers, after which nucleolar morphology in these two populations worsened at a similar rate (Figure 5A, compare to Figure 1D). Concomitant with the recovery of nucleolar morphology, X rDNA expression in F<sub>1</sub> sons from old fathers diminished until 10 days, after which it again increased (Figure 5B, C). During this period, Y: X rDNA ratio also recovered (Figure 5D), revealing remarkable ability of the Y chromosome rDNA to expand in copy number. Together, the recovery of GSC nucleolar morphology and X rDNA repression, combined with the increase in Y:X rDNA ratio during this recovery period in germ cells derived from GSCs, suggests that rDNA copies are expanded in GSCs to restore normal state of rDNA transcription (i.e. Y dominant). Interestingly, while we found many germ cells to have drastically increased Y:X rDNA during this recovery period, there was also a large number of germ cells with Y:X rDNA ratios across the entire range observed in young adults (Figure 5D). This distribution of data suggests that rDNA expansion does not occur tissue-wide, but is instead a stochastic event that occurs individually in some, but not necessarily all, germ cells.

## **Recovery of GSC nucleolar morphology depends on the rDNA magnification pathway**

The observed recovery of GSC rDNA in the sons of aged fathers resembles the phenomenon called ‘rDNA magnification’—the rapid expansion of rDNA copies in the germline of *Drosophila* males with large Y rDNA deletions back to normal amounts (de Cicco and Glover, 1983; Ritossa, 1968). Although the molecular mechanisms of rDNA magnification are not fully understood, it requires the genes *mus-101* (*Drosophila* homolog of TOPBP1 (DNA topoisomerase 2-binding protein 1)) and *mei-41* (*Drosophila* homolog of ATR), factors necessary for the resolution step of homologous recombination (HR)-mediated repair of DNA double-stranded breaks (Hawley and Tartof, 1983; Hawley and Tartof, 1985). We found that *mus-101* and *mei-41* are also required for the recovery of normal nucleolar morphology in the GSCs of animals that



inherit their Y chromosome from aged fathers (Figure 6A-C). Conversely, mutations in *mus-102*, which is required for DNA damage repair but not for rDNA magnification (Hawley and Tartof, 1985), had no effect on the recovery of GSC nucleolar morphology (Figure 6D). These results suggest that similar mechanisms underlie these two phenomena, indicating that rDNA magnification, which has been only observed in specific genetic backgrounds with severely compromised rDNA copy number, may be a normal mechanism to maintain rDNA copy number through generations.

### **rDNA magnification contributes to normal germline rDNA maintenance during aging**

Since we found that rDNA magnification operates under a physiological condition where  $F_1$  sons from old fathers recover nucleolar morphology, we wondered if the rDNA magnification mechanism also contributes to the maintenance of rDNA during aging. However, *yw* controls and mutants for the rDNA magnification pathway exhibited unequal rates of abnormal nucleolar morphology in GSCs at day 0, likely due to background differences in baseline X rDNA copy number (Figure 6B-C, first columns). This variation in initial nucleolar morphology made it difficult to directly compare changes in GSC rDNA content during aging between these genotypes. To control for these background differences in rDNA copy number, we crossed a standard Y chromosome from our wild type strain (*yw*) into wild type X ( $X^{yw}$ ) or *mus-101<sup>D1</sup>* mutant background (note that *mus-101* is an X-linked gene) (Figure 7A,  $F_1$ ). Then these Y chromosomes were allowed to age for 40 days in their respective genetic backgrounds. These Y chromosomes were isolated by crossing the  $F_1$  males to *yw* females, and the state of  $F_1$  Y chromosomes were assessed by nucleolar morphology of  $F_2$  GSCs (Figure 7A). This scheme allowed the comparison of Y chromosomes that have undergone aging in *yw* or *mus-101<sup>D1</sup>* mutant background using the same source of X and Y chromosomes. This scheme effectively eliminated the effects of background variation, as we found that there was no difference in the fraction of GSCs with abnormal nucleolar morphology between the sons of 0 day old *yw* and *mus-101<sup>D1</sup>* mutants (Figure 7B, n.s (p=0.1647)). However, there was a significant difference in the sons of 40 day old animals between *yw* and *mus-101<sup>D1</sup>* mutant (Figure 7B, p=0.0070), suggesting that the *mus-101* mutant fathers suffer more Y chromosome rDNA loss during aging than the *yw* fathers. This result



308 indicates that rDNA magnification contributes to germline rDNA maintenance during normal  
309 aging.

# Discussion

This study provides evidence that rDNA loci are highly unstable but actively maintained genetic loci. Our data sheds light onto a few longstanding questions and also raises new questions for future investigation.

## Destabilization of rDNA loci during aging in *Drosophila* male GSCs.

Our data show that rDNA copy number decreases during aging of *Drosophila* male GSCs. Although early observations indicated that rDNA content may decrease during aging in mammals (Johnson and Strehler, 1972; Strehler, 1986), it was observed using bulk tissues containing mostly post-mitotic cells, and its implication in aging of multicellular organisms has been poorly explored. It was shown that in mouse hematopoietic stem cells, replicative stress is a major driver of stem cell aging (Flach et al., 2014). Curiously, they observed signs of replication stress (accumulation of  $\gamma$ -H2Ax) mainly in the nucleolus, but it remained unclear why the nucleolus specifically accumulates replication stress. We speculate that destabilization of rDNA loci may underlie age-associated accumulation of replication stress in the nucleolus. As rDNA repeats decrease during aging of stem cells, a larger fraction of the remaining rDNA copies must become transcriptionally active to maintain sufficient transcription to support cellular demands for ribosome biogenesis. This may result in a higher chance of collision between replication and transcription machineries, as was observed in a yeast strain with reduced rDNA copy number (Takeuchi et al., 2003), leading to replication stress. Consistent with this idea, we observed that Y chromosome rDNA, which is dominantly transcribed over X chromosome rDNA in *Drosophila melanogaster*, preferentially underwent destabilization, further suggesting that conflicts in replication and transcription machineries destabilize rDNA. It is possible that rDNA instability and replication stress forms a ‘vicious cycle’. First, intra-strand recombination gradually decreases rDNA copy number during aging, necessitating transcriptional activation of remaining rDNA loci. Transcriptional activation of rDNA in turn would increase the chance of collisions occurring between replication and transcription machinery, leading to DNA damage, accelerating the deterioration of the rDNA array.

Our results revealed a decrease in chromosomal rDNA copy number (predominantly on the Y chromosome) during aging. However, our study does not exclude the potential contribution of ERCs. In yeast, ERCs are specifically segregated to mother cells, whereas daughter cells are devoid of ERCs, potentially explaining the mechanism by which daughter cells reset their age (Shcheprova et al., 2008; Sinclair and Guarente, 1997). Although detection of ERCs in GSCs (compared to their daughter cells, gonialblasts) at a single cell resolution is not currently possible, it will be of future interest to investigate whether GSCs do accumulate ERCs and, if so, whether their inheritance is asymmetric.

### **Nucleolar dominance in *Drosophila melanogaster***

Nucleolar dominance is a phenomenon originally discovered in interspecific hybrids, wherein entire rDNA loci from one species are predominantly activated and those from the other species are silenced (Chen et al., 1998; Chen and Pikaard, 1997; Durica and Krider, 1977; Preuss and Pikaard, 2007). However, it was shown that nucleolar dominance also occurs within the *D. melanogaster* males, where Y chromosome rDNA is predominantly expressed, whereas X rDNA is silent (Greil and Ahmad, 2012; Zhou et al., 2012). It remains unknown whether the nucleolar dominance that occurs within a species vs. that in interspecific hybrids represent the same phenomena or share similar molecular mechanisms. Our study may shed light onto the significance of nucleolar dominance. This study reveals the preferential loss of rDNA copy number from the transcriptionally active Y rDNA locus, whereas the X remains silent. There are a few potential explanations why this might be advantageous: 1) by limiting the transcription of rDNA to the Y chromosome, cells can reduce the risk of deleterious recombination events between the X and Y chromosomes, 2) by maintaining a stable chromosomal locus (X rDNA) for later use, stem cells might be able to extend their life span, delaying the timing of collapse and thus the overall aging. It is tempting to speculate that cells evolved nucleolar dominance to protect their rDNA loci, which are distributed among multiple chromosomes, from deleterious recombination.

It was reported that female neuroblasts exhibit co-dominance between two X chromosome rDNA loci (Greil and Ahmad, 2012). We were not able to assess the state of

nucleolar dominance in female GSCs for several reasons: 1) after examining multiple *D. melanogaster* strains, we did not detect sufficient SNPs among different X chromosomes and thus we could not perform SNP *in situ* hybridization in female, 2) female GSCs barely showed abnormal nucleolar morphology in young or old ovaries, however this could be attributed to consistent pairing of two rDNA loci in female GSCs (Joyce et al., 2013), thus we could not rely on nucleolar morphology to infer the state of nucleolar dominance. Nonetheless, activating both rDNA loci on two X chromosomes might not impose as serious a risk as in male GSCs, as recombination between two X chromosomes would not lead to deleterious chromosomal rearrangements. Indeed, our inability to find SNPs among X chromosomes from many strains might reflect homogenization of rDNA sequences among X chromosomes through homologous recombination within the population.

In this study, we have adopted SNP *in situ* hybridization (Levesque et al., 2013) to assess nucleolar dominance. Previous studies on nucleolar dominance have had to rely on significant sequence differences such as those found in interspecific hybrids, and/or mitotic chromosome spreads (where active rDNA loci can be detected as secondary constrictions of the chromosome or histone H3.3 incorporation) (Chandrasekhara et al., 2016; Greil and Ahmad, 2012; Lawrence and Pikaard, 2004; McStay, 2006; McStay and Grummt, 2008). These approaches have limited the study of nucleolar dominance to hybrids or certain cell types. Our approach can open up the study of nucleolar dominance to a significantly broader range of species/cell types.

### **rDNA copy number maintenance through generations**

We showed that rDNA copy number is heritable, wherein old fathers pass a Y chromosome with reduced rDNA copy number to their sons. However, our study revealed that rDNA copy number can recover in the next generation. Although it may be logically deduced that rDNA copy number should not continuously decrease from generation to generation without eventually resulting in complete collapse, the present study is the first to show that rDNA copy number is indeed actively maintained through generations.

Our data provides a few important implications in the mechanism of rDNA copy number maintenance. First, it is of particular importance to note that the visible recovery in rDNA copy number was limited to young adults (~ first 10 days of adulthood) (Figure 5). These results suggest that the rDNA recovery mechanism operates only under certain conditions. It remains unclear if such conditions are developmentally programmed or reflect the limitation of certain cell biological processes that underlie rDNA copy number recovery.

Our study also indicates that the phenomenon classically regarded as ‘rDNA magnification’ is likely to be a manifestation of a general ‘maintenance’ mechanism that operates in the population that experiences normal fluctuations in rDNA copy number. We found that mutants defective in rDNA magnification have more profound abnormality in nucleolar morphology during aging and fail to restore the nucleolar morphology in F<sub>1</sub> sons from old fathers. These findings suggest that the mechanism of rDNA magnification normally functions to maintain rDNA content through generations. While the underlying mechanism for rDNA magnification is unknown, a popular model is that unequal sister chromatid exchange (USCE) expands the number of rDNA copies on a chromatid (at the expense of the other chromatid, which reduces the copy number) (Tartof, 1974). However, it has been noted that the magnitude of rDNA copy number expansion during rDNA magnification is far too large to occur by USCE during a single cell division (de Cicco and Glover, 1983). Considering our observation that the rDNA magnification mechanism is responsible for recovery of GSC nucleolar morphology, it is tempting to speculate that GSCs may undergo repeated USCE during successive asymmetric divisions to increase rDNA copy number. It is worth noting that, although the magnification mechanism appears to be robust enough to expand rDNA copy number during recovery of Y inherited from an old father as well as in males with large rDNA deletions as it was originally described (Ritossa, 1968), the progressive rDNA loss during aging suggests that these mechanisms become less effective as the fly ages. It may be because the rate of rDNA loss increases to an insurmountable amount or the activity of rDNA magnification decreases during aging. It awaits future investigation to understand how such age-related decline in ability of rDNA maintenance occur.

It has been shown that rDNA copy number changes in response to nutrient conditions, and such copy number changes are inherited to the next generations (Aldrich and Maggert, 2015). It has been unknown how this inheritance is achieved. Our results on rDNA copy number changes in germline potentially provide explanation on how rDNA copy number changes are transmitted to the next generation. It awaits future investigation on how nutrient sensing operates in the germline to influence the rDNA copy number to be transmitted to the next generation.

Our findings reveal that tandem rDNA repeats are unstable in *Drosophila* male GSCs, similar to their well characterized instability in yeast, suggesting rDNA loss may occur in other metazoan stem cell populations. Although this instability in germ cells can cause the inheritance of reduced rDNA copies, the germline of young animals has the capacity to restore the lost rDNA copies. These findings suggest that the dynamic contraction and expansion of rDNA loci across generations normally maintains sufficient rDNA copies throughout a population.

## Acknowledgements

We thank Pat DiMario, Bloomington Drosophila Stock Center and Developmental Studies Hybridoma Bank for reagents. We thank the Yamashita lab members, Sue Hammoud and Lei Lei for discussion and comments on the manuscript. This research was supported by Howard Hughes Medical Institute. Kevin Lu is supported by National Institute of Aging (F30 AG050398-01A1). Natalie Warsinger-Pepe is supported by NIH Career Training in Reproductive Biology (5T32HD079342-04).

## Materials and Methods

### Fly husbandry and strains:

All fly stocks were raised on standard Bloomington medium at 25°C. Unless otherwise stated, flies used for wild-type experiments were the standard lab wild-type strain *yw* ( $y^1 w^1$ ). C(1)RM/C(1;Y)6,  $y^1 w^1 f^1/0$  (Bloomington Stock Center), FM6/C(1)DX,  $y^* f^1$  (Bloomington Stock

Center)(Novitski, 1954), Df(YS)*bb/w<sup>1</sup>sn<sup>1</sup>bb<sup>\*</sup>/C(1)RM, y<sup>1</sup>v<sup>1</sup>f<sup>1</sup>* (Bloomington Stock Center). Nopp140-GFP (McCain et al., 2006) (a gift of Pat DiMario, Louisiana State University).

### Immunofluorescence staining and microscopy:

Immunofluorescence staining of testes was performed as described previously (Cheng et al., 2008). Briefly, testes were dissected in PBS, transferred to 4% formaldehyde in PBS and fixed for 30 minutes. Testes were then washed in PBS-T (PBS containing 0.1% Triton-X) for at least 60 minutes, followed by incubation with primary antibody in 3% bovine serum albumin (BSA) in PBS-T at 4°C overnight. Samples were washed for 60 minutes (three 20-minute washes) in PBS-T, incubated with secondary antibody in 3% BSA in PBS-T at 4°C overnight, washed as above, and mounted in VECTASHIELD with DAPI (Vector Labs). The following primary antibodies were used: rat anti-vasa (1:20; DSHB; developed by A. Spradling), rabbit anti-vasa (1:200; d-26; Santa Cruz Biotechnology), mouse anti-Fasciclin III (1:200; DSHB; developed by C. Goodman), rabbit anti-Fibrillarin (1:200; Abcam ab5821), mouse anti-Fibrillarin (1:200; Abcam [38F3] ab4566). Images were taken using a Leica TCS SP8 confocal microscope with 63x oil-immersion objectives (NA=1.4) and processed using Adobe Photoshop software.

### DNA fluorescence *in situ* hybridization

Testes were prepared as described above, and optional immunofluorescence staining protocol was carried out first. Subsequently, fixed samples were incubated with 2 mg/ml RNase A solution at 37°C for 10 minutes, then washed with PBS-T+1mM EDTA. Samples were washed in 2xSSC-T (2xSSC containing 0.1% Tween-20) containing increasing formamide concentrations (20%, 40%, then 50% formamide) for 15 minutes each. Hybridization buffer (50% formamide, 10% dextran sulfate, 2x SSC, 1mM EDTA, 1 µM probe) was added to washed samples. Samples were denatured at 91°C for 2 minutes, then incubated overnight at 37°C. Probes used included Cy5-(AATAAAC)<sub>6</sub> for detection of the Y chromosome and Cy-3-CCACATTTTGCAAATTTTGATGACCCCCCTCCTTACAAAAAATGCG (a part of 359-bp repeats) for detection of the X chromosome.

## Determination of X and Y chromosome SNPs

The X chromosome was isolated by crossing experimental XY males with C(1)RM females, generating X/O males lacking the Y chromosome (and the Y rDNA). The Y chromosome rDNA was isolated by crossing experimental XY males with C(1)DX/Y females, which generated C(1)DX/Y females containing our experimental Y and no rDNA on the compound X chromosome. 45S rRNA genes were sequenced using the following primers to identify single nucleotide variants between the two consensus sequences. ITS region: 5'-CTTGCGTGTTACGGTTGTTTC-3' (forward) and 5'-ACAGCATGGACTGCGATATG-3' (reverse). 18S region: 5'-GAAACGGCTACCACATCTAAGG-3' (forward) and 5'-GGACCTCTCGGTCTAGGAAATA-3' (reverse). 28S region: 5'-AGCCCGATGAACCTGAATATC-3' (forward) and 5'-CATGCTCTTCTAGCCCATCTAC-3' (reverse). Sequence alignment was done using ClustalW2.

## SNP RNA in situ hybridization

For SNP RNA in situ hybridization, all solutions used were RNase-free. Testes were collected in PBS and fixed in 4% formaldehyde in PBS for 30 minutes. Then testes were washed briefly in PBS, and permeabilized in 70% ethanol overnight at 4°C. Following overnight permeabilization, testes were briefly rinsed in 2xSSC with 10% formamide. Hybridization buffer (prepared according to protocol by LGB Biosearch for Stellaris probes) was prepared with probe (50 nM final concentration) and incubated overnight at 37°C. Following hybridization, samples were washed twice in 2x SSC with 10% formamide for 30 minutes each and mounted in VECTASHIELD with DAPI (Vector Labs).

Final concentration of each SNP probe was 100 nM, and each mask oligo was 300 nM. Sequences of SNP probes and oligos are provided in [Supplementary Table 1](#).

## qPCR

Quantitative PCR was carried out using cycling conditions previously described (Aldrich and Maggert, 2014) and *Power* SYBR Green reagent (Applied Biosystems). All numbers were normalized to tRNA-K-CTT, a multicopy tRNA gene known to be interspersed throughout the genome, and GAPDH. Primers used are listed in [Supplementary Table 2](#):



512

### 513 **Mitotic chromosome spreads and fluorescence quantification**

514       Testes were squashed according to previously described methods (Larracuente and  
515 Ferree, 2015). Briefly, testes were dissected into 0.5% sodium citrate for 5-10 minutes and fixed  
516 in 45% acetic acid/2.2% formaldehyde for 4-5 minutes. Fixed tissues were firmly squashed with  
517 a cover slip then slides were submerged in liquid nitrogen. Following liquid nitrogen, slides were  
518 dehydrated in 100% ethanol for at least 5 minutes. Slides were then treated with 0.1 µg/ml RNase  
519 A for 1 hour at room temperature, then dehydrated in 100% ethanol again. Hybridization mix  
520 (50% formamide, 2x SSC, 10% dextran sulfate) with 100 ng each probe was applied directly to the  
521 slide and allowed to hybridize overnight at room temperature. Then slides were washed 3x for  
522 15 minutes in 0.2x SSC, and mounted with VECTASHIELD with DAPI (Vector Labs). Sequences for  
523 probes used are listed in [Supplementary Table 3](#).

524       Fluorescence quantification was done on merged z-stacks using ImageJ using the  
525 Maximum Entropy plugin for automatic thresholding based on the histogram to automatically  
526 determine real signal from noise. Using this method, fluorescent probe signal was measured as  
527 Integrated Density and compared between the X and Y chromosomes.

528

### 529 **Statistical analysis**

530       For comparison of nucleolar morphologies, significance was determined by chi-squared  
531 test using a 2x3 contingency table (Normal; Deformed; Fragmented). For X rDNA activation by  
532 SNP-FISH, because X-only transcription was virtually never detected we simplified the  
533 comparison to Y-only rRNA vs both X and Y-rRNA and performed Student's t-tests.

534

535

536

## Figures

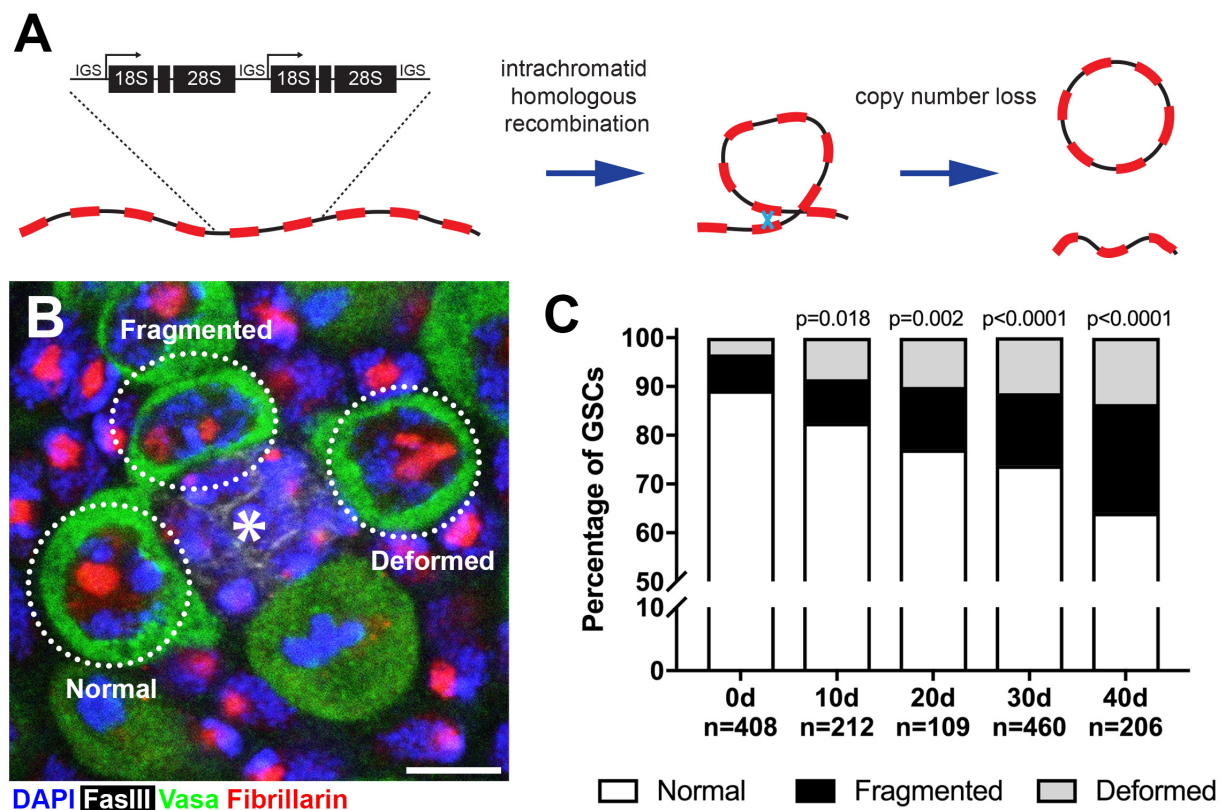

**Figure 1. *Drosophila* male GSCs exhibit perturbations in nucleolar morphology with age.**

**(A)** Illustration of rDNA destabilization through intra-chromatid recombination. **(B)** Apical tip of the testes stained for Fibrillarin (red, nucleolus), Vasa (green, germ cells), Fas III (white, hub) and DAPI (blue). The hub, a major component of the GSC niche, is denoted by the asterisk. GSCs with representative nucleolar morphologies are outlined. Bar: 5  $\mu$ m. **(C)** Distribution of GSC nucleolar morphology during aging, as a percentage of total GSCs scored (n, number of GSCs scored). P-values from chi-squared test (see methods) is shown.

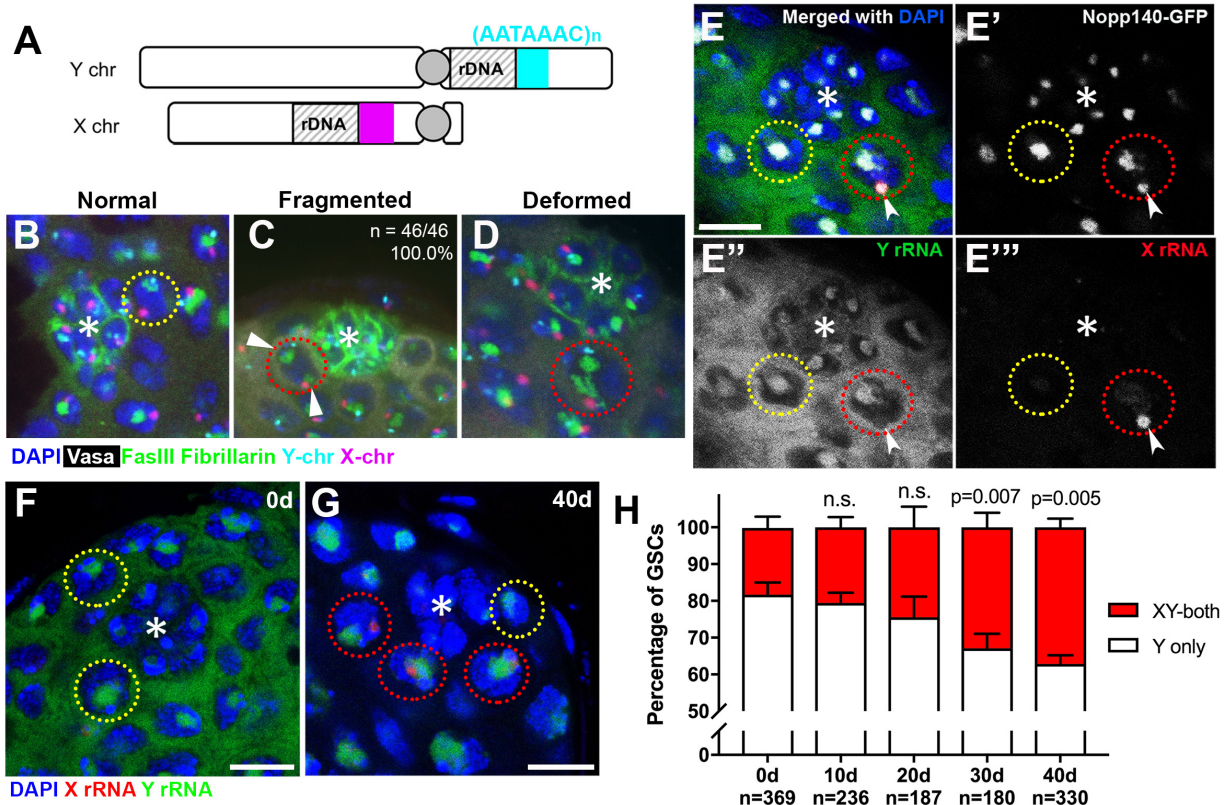

**Figure 2. Transcriptional activation of X rDNA in GSCs with abnormal nucleolar morphology.** (A) Illustration of rDNA loci on Drosophila X and Y chromosomes. Y rDNA locus is juxtaposed to (AATAAAC)<sub>n</sub> satellite repeats (cyan), whereas X rDNA locus is juxtaposed to 359-bp satellite repeats (magenta). (B-D) DNA FISH for the 359-bp satellite repeats (magenta) and (AATAAAC)<sub>n</sub> satellite repeats (cyan), combined with immunofluorescence staining for Vasa (white), FasIII/Fibrillarin (green), DAPI (blue). B: normal nucleolus, C: fragmented nucleoli, D: deformed nucleolus. The hub is denoted by (\*). GSCs with normal nucleolus are indicated by yellow dotted lines, GSCs with abnormal nucleolus are indicated by red dotted lines. (E) SNP *in situ* hybridization with Y and X chromosome-specific rRNA probes combined with Nopp140-GFP to mark nucleolar morphology. Y rRNA (green), X rRNA (red), Nopp140-GFP (white), DAPI (blue). Bar: 7.5 μm. (F, G) SNP *in situ* hybridization in the testes from 0 day (F) and 40 day (G) old flies. GSCs with only Y rRNA (yellow outline) and with both X and Y rRNA transcription (red outline). rRNA (green), X rRNA (red), DAPI (blue). (H) XY rRNA transcription during aging of GSCs, as a percentage of total GSCs scored (n, number of GSCs scored). Mean ± SD (p-value \* ≤0.05, t-test). Note that 'X-only' rRNA transcription was never observed.

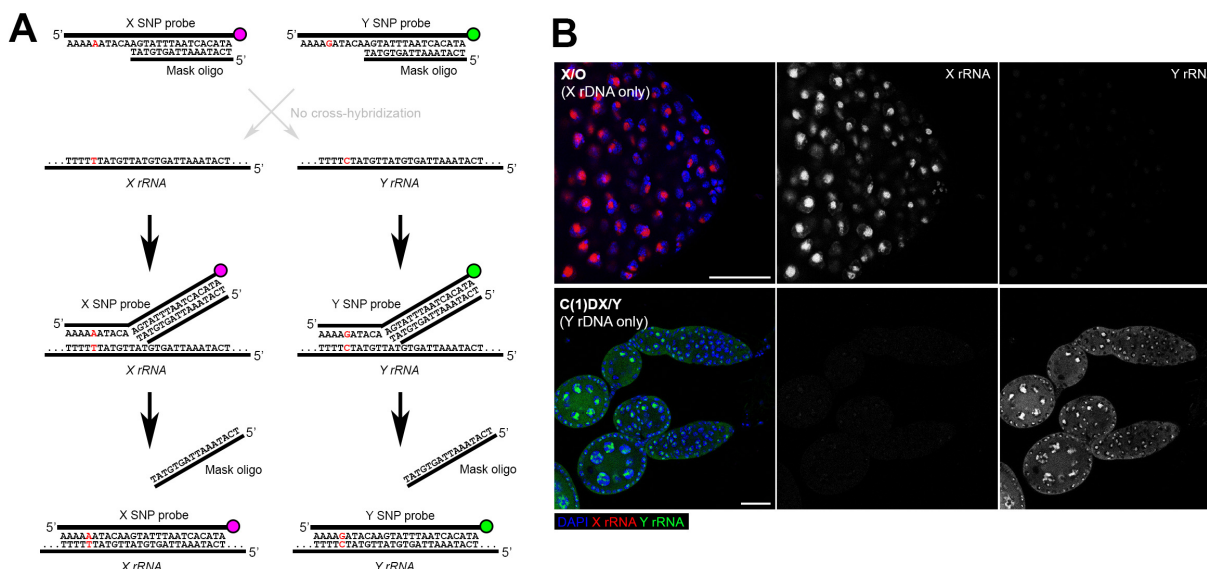

**Figure 2 – figure supplement 1. SNP-FISH is highly specific for rRNA transcribed from the Y vs. X chromosomes**

**(A)** Schematic of the principle behind SNP-FISH for detecting rRNA transcripts. Shown is an example of a SNP in the 18S coding region of the X and Y rDNA. **(B)** Detection of X and Y rRNA using SNP-FISH in X/O (containing only X rDNA) and C(1)DX/Y (containing only Y rDNA) flies shows minimal cross-hybridization between probes. DAPI (blue), Y rRNA (green), X rRNA (red). Bars: 25  $\mu$ m.



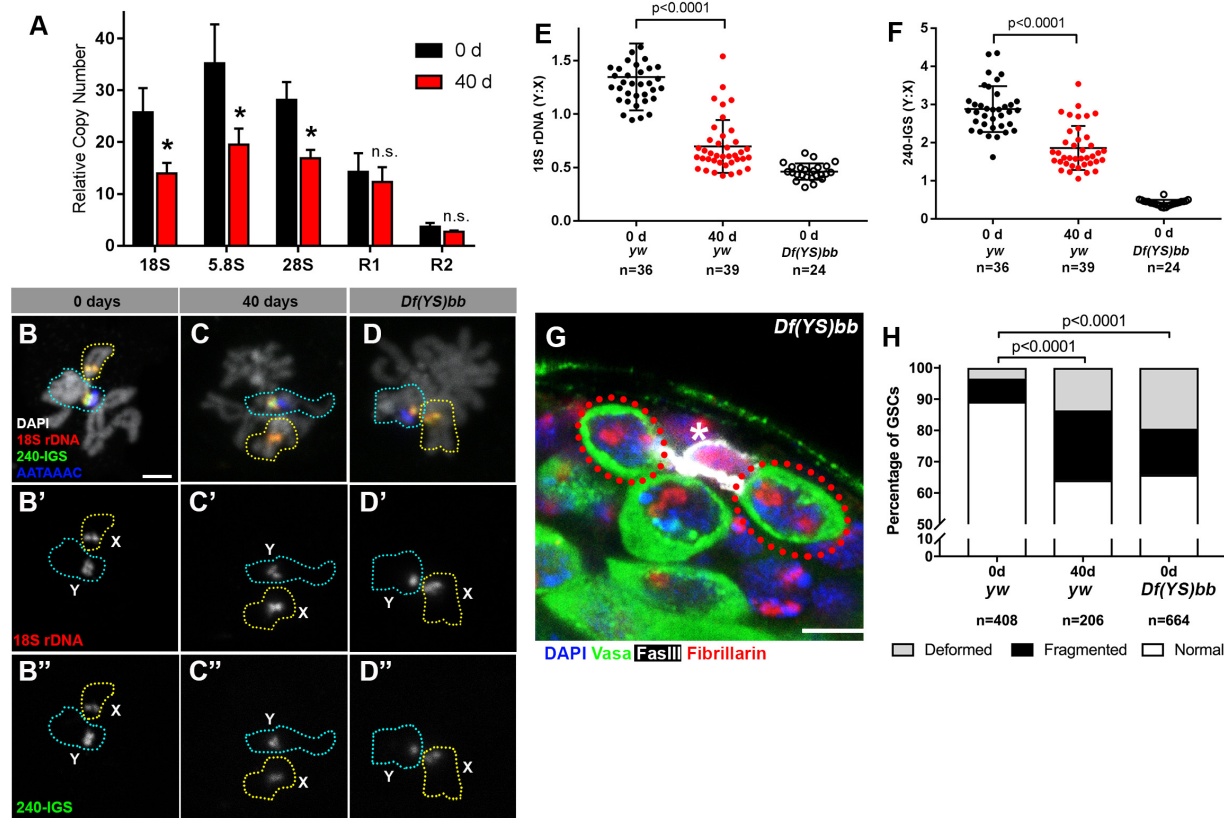

**Figure 3. rRNA gene copy number decrease in germ cells during aging**

(A) rRNA gene copy number quantification by qPCR from 0 day and 40 day old testes. Mean  $\pm$  SD (p-value \*  $\leq 0.05$  t-test). (B-D) FISH on testis mitotic chromosome spreads. DAPI (white), 18S rDNA (red), 240-bp IGS (green), (AATAAAC)<sub>n</sub> (blue). Bar: 2.5 μm. Y chromosome, identified by the presence of (AATAAAC)<sub>n</sub>, is indicated by cyan outline, and X chromosome is indicated by yellow outline. (E) Y:X signal intensity ratio for the 18S rDNA in mitotic germ cells in day 0, day 40 old wild type (yw) testes, and *X/Df(YS)bb* testes. Bracket indicates mean  $\pm$  SD. p-values from Student's t-test is shown. (F) Y:X signal intensity ratio for the IGS in mitotic germ cells in day 0, day 40 old wild type (yw) testes, and *X/Df(YS)bb* testes. Bracket indicates mean  $\pm$  SD. p-values from Student's t-test is shown. Note that different Y:X ratios for 18S vs. IGS probes indicates that Y rDNA locus might have higher number of IGS repeats per rDNA unit. (G) Examples of GSCs with abnormal nucleolar morphology from *X/Df(YS)bb* flies at 0 days (red outline). Fibrillar (red), DAPI (blue), Vasa (green), FasIII (white). The hub is denoted by (\*). Bar: 5 μm. (H) Distribution of GSC nucleolar morphologies in *X/Df(YS)bb* flies compared to 0 and 40 day old WT flies, as a percentage of total GSCs scored (n, number of GSCs scored). Chi-squared test, p-values listed.

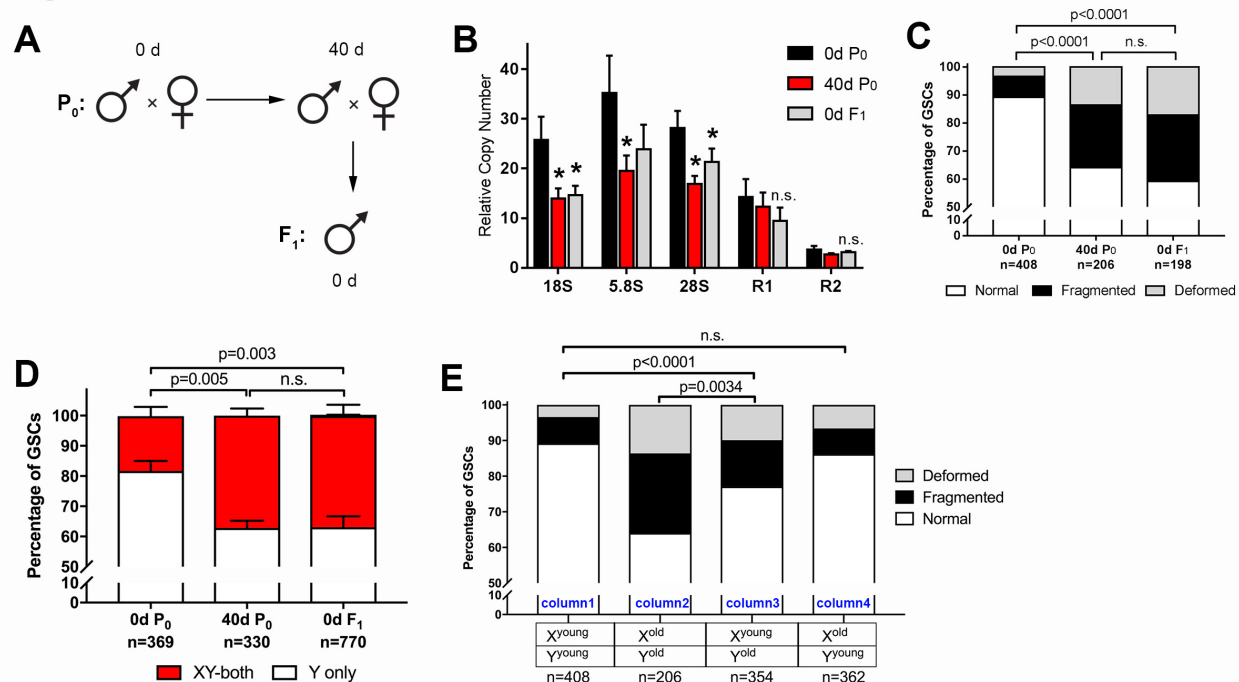

**Figure 4. GSC nucleolar morphology and rDNA copy number decrease is heritable**

**(A)** Scheme for aging of flies and collection of F<sub>1</sub> progeny from old parents. **(B)** rDNA quantification from testes by qPCR in P<sub>0</sub> at 0 and 40 days, and F<sub>1</sub> at 0 days. Mean ± SD (p-value \* ≤ 0.05, t-test). **(C)** GSC nucleolar morphology in young P<sub>0</sub>, old P<sub>0</sub> and young F<sub>1</sub>, as a percentage of total GSCs scored (n, number of GSCs scored). p-values from chi-squared test are shown. **(D)** Nucleolar dominance assessed by SNP in situ in GSCs from young P<sub>0</sub>, old P<sub>0</sub> and young F<sub>1</sub> (n, number of GSCs scored). Mean ± SD. p-value of t-test is shown. Note that 'X-only' rRNA transcription was never observed. **(E)** Effect of X and Y chromosome inheritance from young vs. old parents on nucleolar morphology, as a percentage of total GSCs scored (n, number of GSCs scored). P-value from chi-squared test is shown.

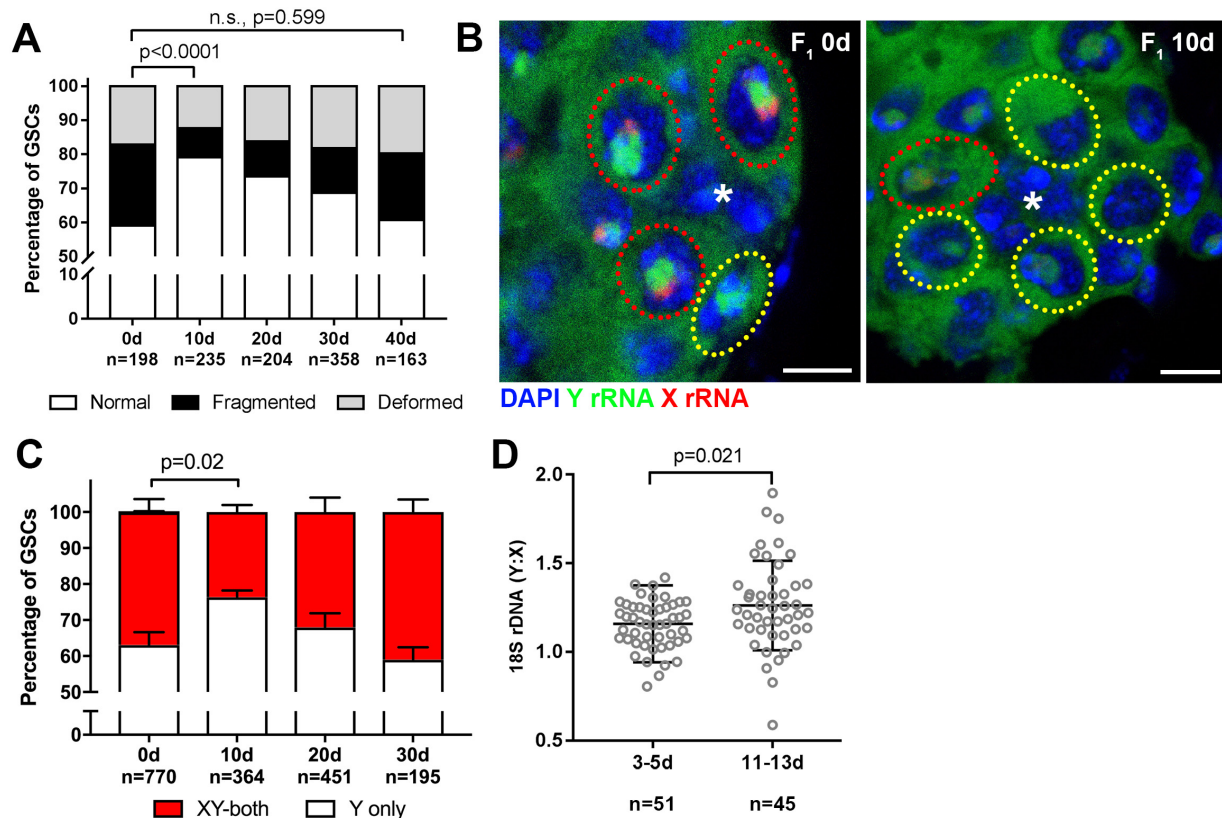

**Figure 5. Recovery of GSC nucleolar morphology, Y rDNA dominance and Y rDNA copy number in  $F_1$  flies**

**(A)** Changes in GSC nucleolar morphology in  $F_1$  flies from old parents, as a percentage of total GSCs scored ( $n$ , number of GSCs scored).  $p$ -value from chi-squared test is shown. **(B)** Nucleolar dominance in GSCs from day 0 and day 10 old  $F_1$  testes assessed by SNP *in situ* hybridization. DAPI (blue), Y rRNA (green), X rRNA (red). The hub is denoted by (\*). Bars: 5  $\mu$ m. Co-dominant GSCs are indicated by red dotted lines, Y-dominant GSCs are indicated by yellow dotted lines. **(C)** Nucleolar dominance in  $F_1$  GSCs during aging, as a percentage of total GSCs scored ( $n$ , number of GSCs scored). Mean  $\pm$  SD.  $p$ -value of  $t$ -test is shown. Note that X-only rRNA transcription was never observed, except for once (out of 770 cells) at day 0, which is included in the graph. **(D)** Ratio of Y:X signal intensity for the 18S rDNA from mitotic chromosome spread of germ cells in  $F_1$  flies. Mean  $\pm$  SD,  $t$ -test.

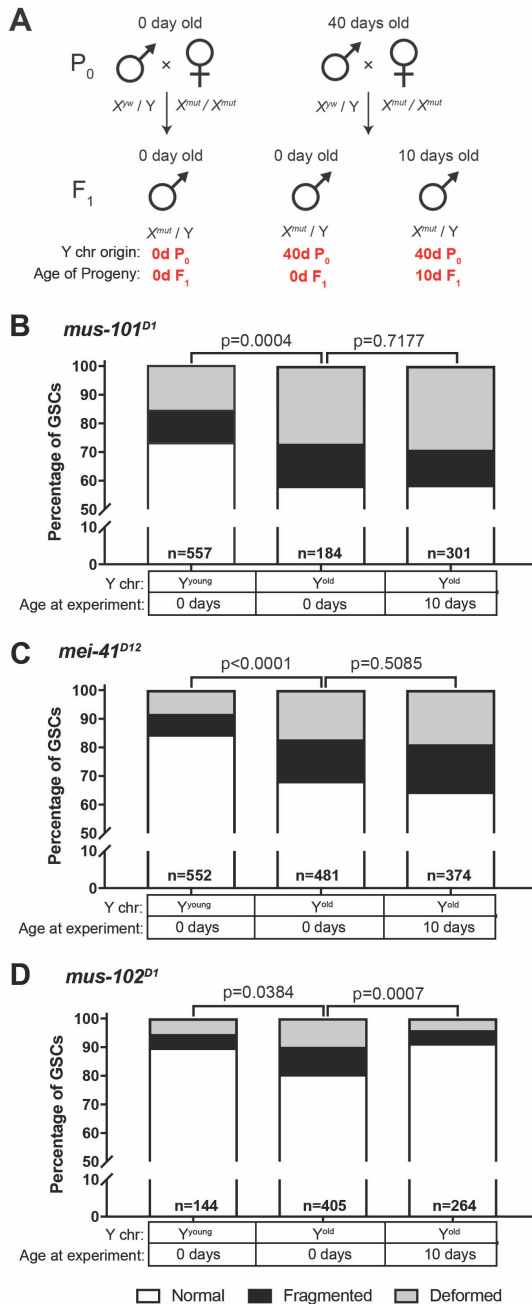

**Figure 6. Recovery of GSC nucleolar morphology requires rDNA magnification genes**

**(A)** Mating scheme to assess the ability to recover nucleolar morphology after inheriting compromised Y chromosome from old fathers. *yw* males (0 or 40 days old) were mated to 0 day old *mus-101<sup>D1</sup>*, *mei-41<sup>D12</sup>*, or *mus-102<sup>D1</sup>* mutant females. GSC nucleolar morphology in *F<sub>1</sub>* mutant males was examined by anti-Fibrillar antibody at day 0 or 10. **(B-D)** GSC nucleolar morphology in 0 and 10 day-old *F<sub>1</sub>* *mus-101<sup>D1</sup>* **(B)**, *mei-41<sup>D12</sup>* **(C)**, and *mus-102<sup>D1</sup>* **(D)** mutants, as a percentage of total GSCs scored (n, number of GSCs scored). p-values from chi-squared test between indicated conditions are shown.



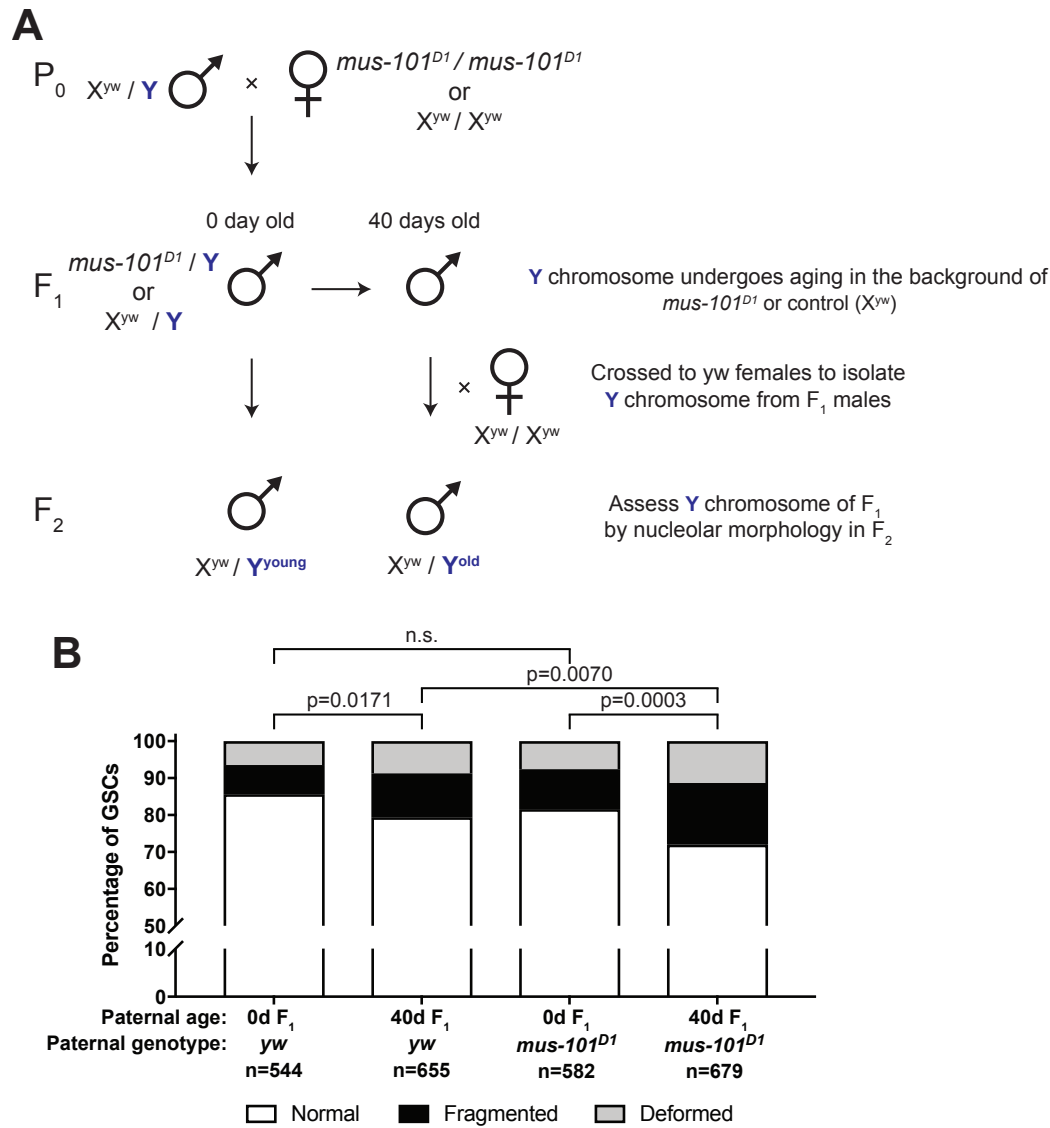

**Figure 7. rDNA magnification genes suppress rDNA loss during aging**

(A) Mating scheme to compare rDNA loss during aging between yw control and  $mus-101^{D1}$  mutant flies. Males with the same Y chromosome are mated to either yw or  $mus-101^{D1}$  females.  $mus-101^{D1}$  and yw F<sub>1</sub> males are mated to young females with the same X chromosome at 0 and 40 days old. All F<sub>2</sub> males have X and Y chromosomes from the same source, independent of paternal age or genotype. (B) GSC nucleolar morphology in the sons of 0 and 40 day old yw and  $mus-101^{D1}$  F<sub>1</sub>, as a percentage of total GSCs scored (n, number of GSCs scored). p-values from chi-squared test between indicated conditions are shown.

# **Supplementary Table 1. rRNA SNP probes**

SNP between X and Y are indicated in red. The areas masked by the masking oligos are indicated by underlines.

| Probe Set | 5'-Sequence-3'-Quasar 570/670 |
|-----------|-------------------------------|
| X SNP1    | AAAAAATACAAGTATTTAATCACATA    |
| Y SNP1    | AAAAGATACAAGTATTTAATCACATA    |
| SNP1 Mask | TATGTGATTAAATACT              |

|           |                             |
|-----------|-----------------------------|
| X SNP2    | GTTTCTTCGATTTTCATGTTTCGAAAC |
| Y SNP2    | GTTTCTTCGATTTTCATGTTTCGAAAC |
| SNP2 Mask | GTTTCGAACATGAAAA            |

|           |                            |
|-----------|----------------------------|
| X SNP3    | AAATATTTATTAACGGTAAGGATATT |
| Y SNP3    | AAATGTTTATTAACGGTAAGGATATT |
| SNP3 Mask | AATATCCTTACCGTTA           |

|           |                            |
|-----------|----------------------------|
| X SNP4    | TTAGGCATTTTGTGTTTACTTGAAAA |
| Y SNP4    | TTAGCCATTTTGTGTTTACTTGAAAA |
| SNP4 Mask | TTTTCAAGTAAACAA            |

**Supplementary Table 2: qPCR primers**

| Primer Name   | 5'-Sequence-3'          | Reference                                              |
|---------------|-------------------------|--------------------------------------------------------|
| tRNA-K-CTT-qF | CTAGCTCAGTCGGTAGAGCATGA | (Aldrich and Maggert, 2014; Paredes and Maggert, 2009) |
| tRNA-K-CTT-qR | CCAACGTGGGGCTCGAAC      |                                                        |
| 18S-qF        | AGCCTGAGAAACGGCTACCA    |                                                        |
| 18S-qR        | AGCTGGGAGTGGGTAATTTACG  |                                                        |
| 28S-qF        | AATGGATGTGATGCCAATGTA   | (Greil and Ahmad, 2012)                                |
| 28S-qR        | TTCAGTGGATCGCAGTATGG    |                                                        |
| 5.8S-qF       | GCTCATGGGTCGATGAAGAA    | This study                                             |
| 5.8S-qR       | GGACTGCGATATGCGTTCA     |                                                        |
| Gapdh-qF      | TAAATTCGACTCGACTCACGGT  | DRSC FlyPrimerBank                                     |
| Gapdh-qR      | CTCCACCACATACTCGGCTC    |                                                        |
| R1 qPCR2 fw   | TAGAGCTTGTAGTGGTCGAG    | This study                                             |
| R1 qPCR2 rv   | ATGGGTCGTCGGCATGATCT    |                                                        |
| R2 qPCR fw    | ATGAACTGTTATCGCGTCCG    |                                                        |
| R2 qPCR rv    | AAACGCGTGGGTTGACTAAC    |                                                        |

**Supplementary Table 3. Probes for rDNA FISH**

| Probe Target   | 5'-Sequence-3'                                                                                                                                                                                                                                                                                                                                                                                                                                                                                                                                                                                                                                                                                                                                                                                                                                                                                                                                                                                                                                                                                                                                                                                                                                                                                                     |
|----------------|--------------------------------------------------------------------------------------------------------------------------------------------------------------------------------------------------------------------------------------------------------------------------------------------------------------------------------------------------------------------------------------------------------------------------------------------------------------------------------------------------------------------------------------------------------------------------------------------------------------------------------------------------------------------------------------------------------------------------------------------------------------------------------------------------------------------------------------------------------------------------------------------------------------------------------------------------------------------------------------------------------------------------------------------------------------------------------------------------------------------------------------------------------------------------------------------------------------------------------------------------------------------------------------------------------------------|
| Y chromosome   | Cy-5-(AATAAAC) <sub>6</sub>                                                                                                                                                                                                                                                                                                                                                                                                                                                                                                                                                                                                                                                                                                                                                                                                                                                                                                                                                                                                                                                                                                                                                                                                                                                                                        |
| 240-bp IGS     | Alexa488-TCCATTCACTAAAATGGCTTTTCTCTATAATACTTA<br>GAGAATATGGGAATATTTCAACATTTTCACT                                                                                                                                                                                                                                                                                                                                                                                                                                                                                                                                                                                                                                                                                                                                                                                                                                                                                                                                                                                                                                                                                                                                                                                                                                   |
| 18S rDNA probe | Stellaris probes. Each oligo was labelled with Quasar 570 on 3' side.<br>Tataactactggcaggatcaac, catggcttaatctttgagacaa, tcacttttaattcgtgtgtact,<br>actgatataatgagccttttgc, ctgttaacgatctaaggaacca, agaattaccacagttatccaag,<br>agggtcatgttttaattgcatg, tagcctaataaaagcacacgctc, aatataacgatcttgcatgcg,<br>atacgatctgcatgttatctag, acatttgaaagatctgtcgtcg, gtcctagatactaccatcaaaa,<br>gatatgagtcctgtattgttat, agtgtactcattccaattacag, caattggctccttgtaaaggat,<br>ccgcaacaactttaatatagcg, agcacaagttaactacgaacg, acaattgtaagttgtactacc,<br>atataagaactccaccggtaat, tgcagggttttaaataggagga, cccacaataacactcgtttaag,<br>tgctttaagcactctaatttgt, cacagaatattcaggcatttga, cagaacagaggtcttatttcat,<br>cctcttgatctgaaaaccaatg, ccaaactgcttctattaatcat, ttaagttagtcttacgacggtc,<br>aacatctttggcaaatgcttct, ctctaactttcgttcttgatta, tcgtttatgggtagaactaggg,<br>gagagagccataaaaagtagcta, aattcctttaagtttcagcttt, aatctgtcttacacacttatgt,<br>ccatagattcgagaaagagcta, atcactccacgaactaagaacg, ttcgttatcggaattaaccaga,<br>caccataatcctgaagatatct, gaatgaaggctacataagcttc, acacaataagcattttactgcc,<br>gctccacttacataaacacatt, gtgtccttataatgggacaaac, gcaatttgtccatttaagaagc,<br>ctgttattgctcaatctcatta, ggtctaggaaatacacgttgat, ttcacaatccaagcatgaaag,<br>gaattccaagttcatcgtgaac, caatgcgagttaatgactcaca, taattcaatcggtagtagcgac |

# References

- Aldrich, J.C., and K.A. Maggert. 2014. Simple quantitative PCR approach to reveal naturally occurring and mutation-induced repetitive sequence variation on the *Drosophila* Y chromosome. *PLoS ONE*. 9:e109906.
- Aldrich, J.C., and K.A. Maggert. 2015. Transgenerational inheritance of diet-induced genome rearrangements in *Drosophila*. *PLoS genetics*. 11:e1005148.
- Boisvert, F.M., S. van Koningsbruggen, J. Navascues, and A.I. Lamond. 2007. The multifunctional nucleolus. *Nature reviews. Molecular cell biology*. 8:574-585.
- Chandrasekhara, C., G. Mohannath, T. Blevins, F. Pontvianne, and C.S. Pikaard. 2016. Chromosome-specific NOR inactivation explains selective rRNA gene silencing and dosage control in *Arabidopsis*. *Genes Dev*. 30:177-190.
- Chen, Z.J., L. Comai, and C.S. Pikaard. 1998. Gene dosage and stochastic effects determine the severity and direction of uniparental ribosomal RNA gene silencing (nucleolar dominance) in *Arabidopsis* allopolyploids. *Proc Natl Acad Sci U S A*. 95:14891-14896.
- Chen, Z.J., and C.S. Pikaard. 1997. Epigenetic silencing of RNA polymerase I transcription: a role for DNA methylation and histone modification in nucleolar dominance. *Genes Dev*. 11:2124-2136.
- Cheng, J., N. Turkel, N. Hemati, M.T. Fuller, A.J. Hunt, and Y.M. Yamashita. 2008. Centrosome misorientation reduces stem cell division during ageing. *Nature*. 456:599-604.
- de Cicco, D.V., and D.M. Glover. 1983. Amplification of rDNA and type I sequences in *Drosophila* males deficient in rDNA. *Cell*. 32:1217-1225.
- Durica, D.S., and H.M. Krider. 1977. Studies on the ribosomal RNA cistrons in interspecific *Drosophila* hybrids. I. Nucleolar dominance. *Dev Biol*. 59:62-74.
- Flach, J., S.T. Bakker, M. Mohrin, P.C. Conroy, E.M. Pietras, D. Reynaud, S. Alvarez, M.E. Diolaiti, F. Ugarte, E.C. Forsberg, M.M. Le Beau, B.A. Stohr, J. Mendez, C.G. Morrison, and E. Passegue. 2014. Replication stress is a potent driver of functional decline in ageing haematopoietic stem cells. *Nature*. 512:198-202.
- Ganley, A.R., S. Ide, K. Saka, and T. Kobayashi. 2009. The effect of replication initiation on gene amplification in the rDNA and its relationship to aging. *Mol Cell*. 35:683-693.
- Ganley, A.R., and T. Kobayashi. 2014. Ribosomal DNA and cellular senescence: new evidence supporting the connection between rDNA and aging. *FEMS Yeast Res*. 14:49-59.
- Greil, F., and K. Ahmad. 2012. Nucleolar dominance of the Y chromosome in *Drosophila melanogaster*. *Genetics*. 191:1119-1128.
- Hawley, R.S., and K.D. Tartof. 1983. The effect of mei-41 on rDNA redundancy in *Drosophila melanogaster*. *Genetics*. 104:63-80.
- Hawley, R.S., and K.D. Tartof. 1985. A two-stage model for the control of rDNA magnification. *Genetics*. 109:691-700.
- Helmrich, A., M. Ballarino, E. Nudler, and L. Tora. 2013. Transcription-replication encounters, consequences and genomic instability. *Nat Struct Mol Biol*. 20:412-418.
- Inaba, M., and Y.M. Yamashita. 2012. Asymmetric stem cell division: precision for robustness. *Cell Stem Cell*. 11:461-469.
- Johnson, R., and B.L. Strehler. 1972. Loss of genes coding for ribosomal RNA in ageing brain cells. *Nature*. 240:412-414.

Joyce, E.F., N. Apostolopoulos, B.J. Beliveau, and C.T. Wu. 2013. Germline Progenitors Escape the Widespread Phenomenon of Homolog Pairing during *Drosophila* Development. *PLoS genetics*. 9:e1004013.

Kobayashi, T. 2008. A new role of the rDNA and nucleolus in the nucleus--rDNA instability maintains genome integrity. *Bioessays*. 30:267-272.

Kobayashi, T. 2011. How does genome instability affect lifespan?: roles of rDNA and telomeres. *Genes Cells*. 16:617-624.

Larracuente, A.M., and P.M. Ferree. 2015. Simple method for fluorescence DNA in situ hybridization to squashed chromosomes. *J Vis Exp*:52288.

Lawrence, R.J., and C.S. Pikaard. 2004. Chromatin turn ons and turn offs of ribosomal RNA genes. *Cell Cycle*. 3:880-883.

Levesque, M.J., P. Ginart, Y. Wei, and A. Raj. 2013. Visualizing SNVs to quantify allele-specific expression in single cells. *Nat Methods*. 10:865-867.

Lopez-Otin, C., M.A. Blasco, L. Partridge, M. Serrano, and G. Kroemer. 2013. The hallmarks of aging. *Cell*. 153:1194-1217.

McCain, J., L. Danzy, A. Hamdi, O. Dellafosse, and P. DiMario. 2006. Tracking nucleolar dynamics with GFP-Nopp140 during *Drosophila* oogenesis and embryogenesis. *Cell Tissue Res*. 323:105-115.

McStay, B. 2006. Nucleolar dominance: a model for rRNA gene silencing. *Genes Dev*. 20:1207-1214.

McStay, B. 2016. Nucleolar organizer regions: genomic 'dark matter' requiring illumination. *Genes Dev*. 30:1598-1610.

McStay, B., and I. Grummt. 2008. The epigenetics of rRNA genes: from molecular to chromosome biology. *Annu Rev Cell Dev Biol*. 24:131-157.

Novitski, E. 1954. The Compound X Chromosomes in *Drosophila*. *Genetics*. 39:127-140.

Ochs, R.L., M.A. Lischwe, W.H. Spohn, and H. Busch. 1985. Fibrillarin: a new protein of the nucleolus identified by autoimmune sera. *Biol Cell*. 54:123-133.

Paredes, S., and K.A. Maggert. 2009. Ribosomal DNA contributes to global chromatin regulation. *Proc Natl Acad Sci U S A*. 106:17829-17834.

Pederson, T. 2011. The nucleolus. *Cold Spring Harbor perspectives in biology*. 3.

Preuss, S., and C.S. Pikaard. 2007. rRNA gene silencing and nucleolar dominance: insights into a chromosome-scale epigenetic on/off switch. *Biochim Biophys Acta*. 1769:383-392.

Ritossa, F., C. Malva, E. Boncinelli, F. Graziani, and L. Polito. 1971. The first steps of magnification of DNA complementary to ribosomal RNA in *Drosophila melanogaster*. *Proc Natl Acad Sci U S A*. 68:1580-1584.

Ritossa, F.M. 1968. Unstable redundancy of genes for ribosomal RNA. *Proc Natl Acad Sci U S A*. 60:509-516.

Shcheprova, Z., S. Baldi, S.B. Frei, G. Gonnet, and Y. Barral. 2008. A mechanism for asymmetric segregation of age during yeast budding. *Nature*.

Sinclair, D.A., and L. Guarente. 1997. Extrachromosomal rDNA circles--a cause of aging in yeast. *Cell*. 91:1033-1042.

Strehler, B.L. 1986. Genetic instability as the primary cause of human aging. *Experimental gerontology*. 21:283-319.

741 Takeuchi, Y., T. Horiuchi, and T. Kobayashi. 2003. Transcription-dependent recombination and  
 742 the role of fork collision in yeast rDNA. *Genes Dev.* 17:1497-1506.  
 743 Tartof, K.D. 1974. Unequal mitotic sister chromatid exchange as the mechanism of ribosomal  
 744 RNA gene magnification. *Proc Natl Acad Sci U S A.* 71:1272-1276.  
 745 Ye, J., and T.H. Eickbush. 2006. Chromatin structure and transcription of the R1- and R2-  
 746 inserted rRNA genes of *Drosophila melanogaster*. *Mol Cell Biol.* 26:8781-8790.  
 747 Zhou, J., T.B. Sackton, L. Martinsen, B. Lemos, T.H. Eickbush, and D.L. Hartl. 2012. Y  
 748 chromosome mediates ribosomal DNA silencing and modulates the chromatin state in  
 749 *Drosophila*. *Proc Natl Acad Sci U S A.* 109:9941-9946.  
 750
